# Supplementary material for: Statistical analysis of control parameters in evolutionary map L-systems-based topology optimization
Source: Springer Nature journal article supplement (doi:10.1007/s00158-018-1943-1), 2018-03-19
Supplement: MOESM1 [file 15547434]

## Sheet: Table 4
This .xlsx-file contains an extended version of Table 4 in the manuscript “Statistical Analysis of Control Parameters in Evolutionary Map L-Systems-based Topology Optimization” (manuscript number: SAMO-D-17-00629).
							Ranks (in test cases)
Parameter combination	numberOfIndividuals	tournamentPool	crossoverRate	mutationRate	crossoverType	elitismBool	1	2	3	4	5	averageRank	averageSuccessRate* [-]	averageEvals [10^3]	numberOfRuns
1	200	8	0.6	0.04	two-point	TRUE	4	20	5	2	3	6.8	0.66425	13.58	70
2	200	8	0.8	0.04	two-point	TRUE	2	9	1	24	8	8.8	0.71425	13.4	70
3	200	8	1	0.04	two-point	TRUE	1	6	11	23	20	12.2	0.66075	12.89	70
4	200	8	0.6	0.04	distributed	TRUE	18	8	18	7	16	13.4	0.642875	14.22	70
5	200	4	0.6	0.02	two-point	TRUE	10	18	3	32	9	14.4	0.607125	14.36	70
6	150	8	0.8	0.04	two-point	TRUE	8	7	6	51	14	17.2	0.642875	10.76	70
7	200	8	0.8	0.02	two-point	TRUE	44	17	21	6	4	18.4	0.507125	13.68	70
8	150	8	0.6	0.04	two-point	TRUE	9	34	17	37	6	20.6	0.58575	10.46	70
9	200	4	0.6	0.04	two-point	TRUE	7	5	2	57	38	21.8	0.63575	15.21	70
10	200	8	0.6	0.02	two-point	TRUE	36	57	19	1	2	23	0.53575	13.32	70
11	200	4	0.8	0.02	two-point	TRUE	6	4	20	15	74	23.8	0.65	14.11	70
12	200	8	1	0.02	two-point	TRUE	26	47	10	8	28	23.8	0.553625	13.16	70
13	200	4	0.8	0.04	two-point	TRUE	16	23	12	22	58	26.2	0.58575	14.29	70
14	200	8	0.8	0.04	distributed	TRUE	32	12	27	14	50	27	0.61075	14.29	70
15	150	8	1	0.04	two-point	TRUE	5	24	13	55	39	27.2	0.592875	10.58	70
16	200	8	0.6	0.04	two-point	FALSE	11	14	8	83	21	27.4	0.575	12.6	70
17	150	4	1	0.02	two-point	TRUE	22	38	23	17	60	32	0.58575	10.65	70
18	150	4	0.6	0.02	two-point	TRUE	47	29	30	41	23	34	0.517875	11.17	70
19	150	4	0.6	0.04	two-point	TRUE	15	32	7	36	80	34	0.582125	11.15	70
20	150	8	0.8	0.02	two-point	TRUE	45	83	37	3	5	34.6	0.496375	10.51	70
21	150	8	0.6	0.04	distributed	TRUE	17	43	29	71	18	35.6	0.55	10.58	70
22	200	8	0.6	0.02	two-point	FALSE	48	66	26	34	12	37.2	0.446375	13.36	70
23	200	8	0.6	0.02	distributed	TRUE	53	87	43	4	1	37.6	0.478625	14.94	70
24	200	8	0.8	0.02	distributed	TRUE	13	45	70	28	34	38	0.53575	13.57	70
25	200	4	0.6	0.02	distributed	TRUE	42	42	9	13	85	38.2	0.6	15.07	70
26	150	4	0.8	0.02	two-point	TRUE	29	36	16	78	37	39.2	0.55	10.65	70
27	100	8	0.8	0.04	two-point	TRUE	57	51	24	29	36	39.4	0.532125	7.34	70
28	100	8	0.6	0.04	two-point	TRUE	50	69	15	61	11	41.2	0.532125	7.28	70
29	200	4	1	0.04	two-point	TRUE	27	11	28	48	96	42	0.55	14.44	70
30	200	4	1	0.02	two-point	TRUE	3	2	25	18	169	43.4	0.65	13.81	70
31	150	8	0.8	0.04	distributed	TRUE	51	35	44	21	70	44.2	0.542875	10.7	70
32	150	8	0.8	0.02	distributed	TRUE	61	98	38	9	26	46.4	0.496375	10.87	70
33	200	8	0.8	0.02	two-point	FALSE	69	73	40	42	22	49.2	0.425	12.86	70
34	150	4	0.8	0.04	two-point	TRUE	20	50	4	64	124	52.4	0.557125	11.14	70
35	100	8	0.6	0.04	distributed	TRUE	34	80	47	73	29	52.6	0.5	7.44	70
36	150	8	0.8	0.02	two-point	FALSE	68	91	49	31	25	52.8	0.43575	9.72	70
37	200	8	0.6	0.02	distributed	FALSE	67	117	59	12	13	53.6	0.425	13.21	70
38	150	8	0.6	0.02	two-point	TRUE	85	96	51	16	24	54.4	0.407125	10.53	70
39	100	8	1	0.04	two-point	TRUE	24	40	56	77	77	54.8	0.492875	7.08	70
40	150	8	1	0.02	two-point	TRUE	56	93	61	27	41	55.6	0.421375	10.33	70
41	150	8	1	0.02	two-point	FALSE	71	68	31	44	68	56.4	0.43925	9.46	70
42	150	8	0.6	0.02	distributed	TRUE	82	114	64	19	7	57.2	0.392875	10.94	70
43	200	8	0.8	0.04	two-point	FALSE	14	1	22	144	107	57.6	0.578625	12.04	70
44	200	8	1	0.04	two-point	FALSE	12	3	14	120	144	58.6	0.603625	12.12	70
45	150	8	1	0.02	distributed	TRUE	59	27	39	30	142	59.4	0.503625	10.74	70
46	150	8	0.6	0.04	two-point	FALSE	23	44	46	130	61	60.8	0.492875	9.54	70
47	200	8	1	0.02	two-point	FALSE	54	71	35	86	59	61	0.453625	12.21	70
48	150	8	0.6	0.02	two-point	FALSE	116	107	58	10	17	61.6	0.378625	10.3	70
49	100	4	1	0.02	two-point	TRUE	52	61	54	72	73	62.4	0.46075	7.7	70
50	150	4	0.6	0.02	distributed	TRUE	80	99	53	33	54	63.8	0.453625	11.63	70
51	100	4	0.8	0.02	two-point	TRUE	28	39	71	106	78	64.4	0.467875	7.65	70
52	200	8	1	0.02	distributed	TRUE	33	10	36	25	222	65.2	0.56075	13.6	70
53	200	8	0.6	0.04	distributed	FALSE	19	13	73	113	109	65.4	0.51425	13.13	70
54	100	8	0.6	0.02	two-point	TRUE	88	123	80	43	10	68.8	0.35	7.13	70
55	100	4	0.6	0.02	two-point	TRUE	84	64	75	79	44	69.2	0.4	7.7	70
56	150	8	0.8	0.04	two-point	FALSE	38	25	72	137	82	70.8	0.475	9.73	70
57	150	8	0.6	0.02	distributed	FALSE	100	105	89	38	27	71.8	0.328625	10.13	70
58	100	8	1	0.04	distributed	TRUE	114	70	41	49	87	72.2	0.457125	7.54	70
59	200	8	0.8	0.02	distributed	FALSE	64	90	63	67	81	73	0.407125	12.83	70
60	200	4	0.6	0.02	two-point	FALSE	30	33	68	93	143	73.4	0.507125	13.21	70
61	100	8	0.8	0.02	distributed	TRUE	86	126	84	40	35	74.2	0.342875	7.46	70
62	100	8	1	0.02	two-point	TRUE	77	119	106	60	19	76.2	0.332125	7.5	70
63	100	4	0.8	0.04	two-point	TRUE	55	53	34	65	176	76.6	0.503625	7.75	70
64	100	8	0.8	0.04	distributed	TRUE	43	59	69	101	112	76.8	0.471375	7.58	70
65	100	4	0.6	0.04	two-point	TRUE	72	63	32	114	105	77.2	0.46075	7.8	70
66	100	8	1	0.02	distributed	TRUE	83	92	83	59	71	77.6	0.407125	7.29	70
67	200	4	0.6	0.04	distributed	TRUE	93	110	50	58	79	78	0.428625	15.22	70
68	200	8	1	0.04	distributed	TRUE	95	60	57	20	164	79.2	0.5	13.92	70
69	200	4	0.8	0.02	two-point	FALSE	25	22	65	45	240	79.4	0.55	13.26	70
70	100	4	0.6	0.02	distributed	TRUE	73	67	87	90	91	81.6	0.428625	8.05	70
71	150	4	1	0.04	two-point	TRUE	63	46	33	98	168	81.6	0.482125	10.84	70
72	100	8	0.8	0.02	two-point	TRUE	97	133	81	68	30	81.8	0.307125	7.23	70
73	100	8	0.6	0.02	distributed	TRUE	113	124	110	54	15	83.2	0.303625	7.53	70
74	150	8	1	0.04	distributed	TRUE	81	30	48	62	215	87.2	0.51425	10.75	70
75	150	4	0.8	0.02	distributed	TRUE	109	75	66	76	117	88.6	0.46425	11.21	70
76	200	4	0.8	0.02	distributed	TRUE	142	81	78	11	132	88.8	0.446375	15.05	70
77	150	8	1	0.04	two-point	FALSE	35	28	60	160	167	90	0.507125	9.42	70
78	150	4	0.6	0.02	two-point	FALSE	21	49	105	134	150	91.8	0.446375	10.14	70
79	150	8	0.8	0.02	distributed	FALSE	49	125	88	94	119	95	0.33925	9.88	70
80	200	4	1	0.02	two-point	FALSE	40	15	119	66	241	96.2	0.48925	13	70
81	100	8	0.6	0.02	two-point	FALSE	120	143	93	95	31	96.4	0.278625	6.77	70
82	100	8	0.8	0.02	two-point	FALSE	99	147	117	99	32	98.8	0.282125	6.69	70
83	150	8	0.6	0.04	distributed	FALSE	70	52	76	121	175	98.8	0.425	9.76	70
84	100	4	0.8	0.02	distributed	TRUE	118	65	45	97	172	99.4	0.43925	7.67	70
85	200	4	0.6	0.04	two-point	FALSE	31	48	121	92	212	100.8	0.428625	13.31	70
86	100	8	0.6	0.02	distributed	FALSE	92	144	131	96	42	101	0.28925	6.79	70
87	150	4	0.6	0.04	distributed	TRUE	106	120	42	104	133	101	0.403625	11.27	70
88	100	4	1	0.04	two-point	TRUE	62	84	55	163	145	101.8	0.421375	7.49	70
89	200	4	0.6	0.02	distributed	FALSE	65	97	102	70	188	104.4	0.41425	14.07	70
90	200	8	1	0.02	distributed	FALSE	107	19	104	26	272	105.6	0.417875	13.41	70
91	50	8	0.6	0.04	two-point	TRUE	87	111	113	177	47	107	0.31425	3.75	70
92	50	8	0.6	0.04	distributed	TRUE	105	132	99	136	64	107.2	0.33575	3.73	70
93	150	4	0.8	0.02	two-point	FALSE	39	55	94	149	206	108.6	0.428625	10.11	70
94	100	8	1	0.02	two-point	FALSE	90	108	111	135	104	109.6	0.31075	6.51	70
95	100	8	0.6	0.04	two-point	FALSE	41	85	103	175	146	110	0.396375	6.68	70
96	50	4	0.8	0.02	two-point	TRUE	110	116	91	146	90	110.6	0.317875	3.94	70
97	200	8	0.8	0.04	distributed	FALSE	60	16	126	119	232	110.6	0.471375	12.89	70
98	200	2	0.6	0.02	two-point	TRUE	144	158	92	115	53	112.4	0.23575	15.33	70
99	200	2	0.8	0.02	two-point	TRUE	156	142	134	87	43	112.4	0.23925	15.33	70
100	200	4	0.8	0.04	two-point	FALSE	46	58	129	74	255	112.4	0.392875	13.59	70
101	100	4	1	0.02	distributed	TRUE	152	102	109	81	141	117	0.371375	7.61	70
102	50	8	0.8	0.04	two-point	TRUE	125	130	95	209	33	118.4	0.242875	3.76	70
103	50	8	1	0.02	distributed	TRUE	143	165	107	122	57	118.8	0.23925	3.87	70
104	100	8	0.8	0.04	two-point	FALSE	58	82	67	221	174	120.4	0.375	6.56	70
105	150	8	1	0.02	distributed	FALSE	102	41	82	105	285	123	0.378625	10.05	70
106	150	4	1	0.02	distributed	TRUE	164	103	138	39	173	123.4	0.342875	11.22	70
107	50	8	1	0.04	distributed	TRUE	147	101	90	192	89	123.8	0.28925	3.71	70
108	200	4	0.8	0.04	distributed	TRUE	172	189	79	85	95	124	0.23575	14.44	70
109	200	2	1	0.02	two-point	TRUE	166	177	128	110	40	124.2	0.18575	15.12	70
110	150	4	1	0.02	two-point	FALSE	66	21	122	153	260	124.4	0.43925	9.88	70
111	50	4	0.8	0.04	two-point	TRUE	133	148	52	189	101	124.6	0.328625	3.98	70
112	50	4	0.6	0.02	distributed	TRUE	119	149	85	155	122	126	0.28575	4	70
113	50	8	1	0.04	two-point	TRUE	96	113	100	168	154	126.2	0.303625	3.85	70
114	150	4	0.6	0.02	distributed	FALSE	89	74	112	154	202	126.2	0.367875	10.65	70
115	150	4	0.6	0.04	two-point	FALSE	78	62	118	151	238	129.4	0.36075	10.61	70
116	50	4	0.6	0.04	two-point	TRUE	127	128	77	194	131	131.4	0.328625	3.91	70
117	100	8	0.6	0.04	distributed	FALSE	111	54	108	213	178	132.8	0.357125	6.78	70
118	150	4	0.8	0.04	distributed	TRUE	184	190	62	102	129	133.4	0.221375	11.01	70
119	50	8	0.6	0.02	two-point	FALSE	161	169	150	139	49	133.6	0.18925	3.73	70
120	200	4	1	0.02	distributed	TRUE	221	104	155	35	153	133.6	0.321375	13.95	70
121	150	2	0.6	0.02	two-point	TRUE	169	167	86	112	140	134.8	0.217875	11.57	70
122	50	8	1	0.02	two-point	TRUE	122	176	146	166	65	135	0.23575	3.71	70
123	200	4	1	0.04	two-point	FALSE	74	94	151	89	270	135.6	0.342875	13.45	70
124	50	8	0.8	0.02	distributed	TRUE	128	172	190	111	83	136.8	0.207125	3.86	70
125	100	4	0.6	0.04	distributed	TRUE	131	140	74	161	179	137	0.357125	7.57	70
126	50	4	0.6	0.02	two-point	TRUE	112	136	137	208	93	137.2	0.21075	4.16	70
127	50	8	0.8	0.04	distributed	TRUE	115	134	143	159	135	137.2	0.271375	3.89	70
128	50	8	0.8	0.02	two-point	TRUE	145	170	161	103	114	138.6	0.232125	3.8	70
129	50	4	1	0.02	two-point	TRUE	104	127	116	158	193	139.6	0.292875	3.97	70
130	150	8	0.8	0.04	distributed	FALSE	76	31	141	185	265	139.6	0.38575	9.96	70
131	150	4	0.8	0.04	two-point	FALSE	98	72	114	141	274	139.8	0.328625	10.25	70
132	200	4	1	0	distributed	TRUE	187	152	140	56	166	140.2	0.2	12.07	70
133	150	2	0.8	0.02	two-point	TRUE	178	194	125	91	116	140.8	0.207125	11.13	70
134	200	8	1	0.04	distributed	FALSE	151	26	145	100	286	141.6	0.38575	13.12	70
135	50	8	0.6	0.02	two-point	TRUE	140	180	166	179	46	142.2	0.18925	3.71	70
136	100	8	0.8	0.02	distributed	FALSE	132	153	136	142	155	143.6	0.21075	7.05	70
137	100	8	1	0.04	two-point	FALSE	37	78	96	237	271	143.8	0.38925	6.34	70
138	150	4	1	0	distributed	TRUE	190	171	198	46	125	146	0.146375	8.99	70
139	50	8	1	0.02	two-point	FALSE	137	175	157	127	136	146.4	0.232125	3.46	70
140	200	4	0.8	0.02	distributed	FALSE	177	88	185	50	234	146.8	0.325	13.45	70
141	100	4	0.6	0.02	two-point	FALSE	91	106	127	229	184	147.4	0.253625	7.2	70
142	100	8	1	0.02	distributed	FALSE	117	89	97	171	264	147.6	0.325	6.69	70
143	100	8	0.8	0.04	distributed	FALSE	75	56	135	186	293	149	0.38575	6.69	70
144	150	8	1	0.04	distributed	FALSE	136	37	168	128	289	151.6	0.367875	10.21	70
145	150	4	1	0.04	two-point	FALSE	94	86	148	138	296	152.4	0.31425	10.14	70
146	200	2	0.6	0.04	two-point	TRUE	185	217	169	145	48	152.8	0.103625	13.75	70
147	50	4	0.8	0.02	distributed	TRUE	123	151	123	176	192	153	0.303625	4.06	70
148	50	8	0.6	0.02	distributed	TRUE	150	174	142	172	128	153.2	0.18575	3.85	70
149	200	2	1	0	two-point	TRUE	179	179	177	118	113	153.2	0.142875	12.7	70
150	150	2	0.6	0.04	two-point	TRUE	188	214	191	88	88	153.8	0.11425	10.93	70
151	200	2	0.8	0	distributed	TRUE	234	205	203	53	76	154.2	0.132125	14.46	70
152	100	2	0.8	0.02	two-point	TRUE	167	154	130	131	203	157	0.232125	8.09	70
153	150	4	0.8	0.02	distributed	FALSE	168	112	178	80	249	157.4	0.3	10.12	70
154	100	2	0.6	0.02	two-point	TRUE	180	163	98	147	200	157.6	0.207125	7.78	70
155	50	8	0.6	0.02	distributed	FALSE	157	181	158	165	130	158.2	0.175	3.62	70
156	50	4	1	0.04	two-point	TRUE	124	131	124	196	221	159.2	0.303625	3.81	70
157	200	2	0.6	0.02	distributed	TRUE	224	242	215	75	45	160.2	0.08925	14.29	70
158	100	4	0.8	0.02	two-point	FALSE	79	95	154	223	254	161	0.28575	6.85	70
159	100	4	0.6	0.02	distributed	FALSE	108	118	133	169	280	161.6	0.325	6.92	70
160	100	4	0.8	0.04	distributed	TRUE	175	156	167	148	162	161.6	0.232125	7.28	70
161	200	4	1	0.02	distributed	FALSE	217	146	197	47	201	161.6	0.23925	13.19	70
162	100	4	1	0.02	two-point	FALSE	103	77	171	182	278	162.2	0.33925	6.7	70
163	200	2	1	0	distributed	TRUE	250	253	204	5	103	163	0.157125	14.3	70
164	200	2	0.6	0	distributed	TRUE	227	200	162	107	134	166	0.146375	14.55	70
165	200	4	1	0	distributed	FALSE	210	159	192	63	208	166.4	0.175	11.92	70
166	50	8	0.8	0.02	two-point	FALSE	139	178	147	174	196	166.8	0.207125	3.4	70
167	200	2	0.8	0.04	two-point	TRUE	199	210	179	195	51	166.8	0.078625	13.68	70
168	50	4	1	0.02	distributed	TRUE	158	129	115	215	224	168.2	0.246375	4.15	70
169	150	2	1	0.02	two-point	TRUE	186	185	159	193	123	169.2	0.15	10.7	70
170	150	2	1	0	distributed	TRUE	239	232	213	69	94	169.4	0.107125	10.66	70
171	50	8	0.6	0.04	two-point	FALSE	138	145	101	230	242	171.2	0.282125	3.31	70
172	50	8	1	0.04	two-point	FALSE	101	100	156	243	266	173.2	0.296375	3.53	70
173	100	4	0.6	0.04	two-point	FALSE	126	76	163	199	303	173.4	0.275	6.84	70
174	100	2	1	0.02	two-point	TRUE	189	161	160	187	171	173.6	0.21075	7.57	70
175	200	4	1	0.04	distributed	TRUE	286	224	176	123	86	179	0.13925	12.89	70
176	200	2	1	0.04	two-point	TRUE	214	268	195	170	55	180.4	0.067875	13.33	70
177	50	4	0.6	0.04	distributed	TRUE	153	184	164	235	170	181.2	0.207125	3.88	70
178	200	4	0.6	0.04	distributed	FALSE	165	168	196	132	246	181.4	0.171375	12.76	70
179	150	2	0.8	0.04	two-point	TRUE	205	240	225	188	56	182.8	0.067875	10.38	70
180	200	2	1	0	distributed	FALSE	291	249	221	52	106	183.8	0.11075	13.07	70
181	150	2	0.8	0	distributed	TRUE	254	234	206	116	115	185	0.11425	10.46	70
182	150	2	1	0	two-point	TRUE	197	203	242	125	160	185.4	0.092875	9.6	70
183	150	4	1	0	distributed	FALSE	233	188	230	84	199	186.8	0.132125	8.66	70
184	50	8	0.8	0.04	two-point	FALSE	141	121	120	269	290	188.2	0.271375	3.35	70
185	150	2	0.6	0.02	distributed	TRUE	215	257	234	178	62	189.2	0.078625	10.67	70
186	150	4	1	0.02	distributed	FALSE	200	135	220	156	235	189.2	0.207125	10.4	70
187	50	8	0.6	0.04	distributed	FALSE	121	150	132	279	267	189.8	0.228625	3.53	70
188	50	4	0.8	0.04	distributed	TRUE	191	187	139	256	180	190.6	0.21425	3.84	70
189	150	4	1	0.04	distributed	TRUE	277	215	170	129	163	190.8	0.167875	9.87	70
190	100	4	0.8	0.04	two-point	FALSE	148	115	165	236	295	191.8	0.203625	6.77	70
191	100	8	1	0.04	distributed	FALSE	149	79	188	227	319	192.4	0.3	6.62	70
192	50	8	1	0.02	distributed	FALSE	134	191	173	207	262	193.4	0.221375	3.47	70
193	200	2	0.6	0.04	distributed	TRUE	229	259	246	167	69	194	0.06075	13.56	70
194	150	4	0.6	0.04	distributed	FALSE	162	193	182	152	282	194.2	0.182125	9.86	70
195	150	2	1	0.04	two-point	TRUE	226	247	219	216	63	194.2	0.053625	10.3	70
196	200	4	0.8	0.04	distributed	FALSE	219	231	186	124	211	194.2	0.11425	12.42	70
197	100	4	1	0.04	distributed	TRUE	209	202	153	191	220	195	0.203625	6.89	70
198	200	2	0.6	0.02	two-point	FALSE	193	207	238	157	189	196.8	0.08575	12.55	70
199	100	4	1	0	distributed	TRUE	211	211	226	183	156	197.4	0.1	5.53	70
200	200	2	0.8	0.02	distributed	TRUE	243	281	233	162	75	198.8	0.046375	12.91	70
201	50	4	1	0.04	distributed	TRUE	183	182	144	245	250	200.8	0.203625	3.91	70
202	100	4	0.8	0.02	distributed	FALSE	171	109	214	214	297	201	0.23925	6.93	70
203	50	8	0.8	0.02	distributed	FALSE	154	195	224	250	186	201.8	0.153625	3.54	70
204	50	8	0.8	0.04	distributed	FALSE	129	137	149	302	292	201.8	0.242875	3.47	70
205	200	2	0.8	0	two-point	TRUE	212	186	207	190	216	202.2	0.057125	12.47	70
206	100	4	1	0.04	two-point	FALSE	155	122	239	184	314	202.8	0.26075	6.7	70
207	200	2	1	0	two-point	FALSE	198	206	211	143	256	202.8	0.092875	11.83	70
208	50	2	0.6	0.02	two-point	TRUE	176	209	184	268	182	203.8	0.132125	3.9	70
209	100	2	0.6	0.04	two-point	TRUE	195	225	235	258	127	208	0.053625	7.33	70
210	150	2	0.6	0.04	distributed	TRUE	235	265	245	244	52	208.2	0.03575	10.33	70
211	200	4	0.8	0	distributed	TRUE	208	226	189	173	245	208.2	0.107125	10.25	70
212	100	4	1	0.02	distributed	FALSE	206	141	209	201	287	208.8	0.18925	6.94	70
213	200	4	1	0.04	distributed	FALSE	289	238	228	150	139	208.8	0.06075	12.18	70
214	200	2	0.6	0	distributed	FALSE	242	228	187	205	183	209	0.075	13.6	70
215	50	2	0.8	0.02	two-point	TRUE	174	199	172	271	230	209.2	0.13575	3.86	70
216	200	2	0.8	0	distributed	FALSE	302	250	232	117	148	209.8	0.075	13.35	70
217	200	8	1	0	distributed	TRUE	196	183	193	203	276	210.2	0.107125	8.92	70
218	100	2	0.8	0	distributed	TRUE	287	237	202	133	195	210.8	0.096375	6.93	70
219	100	4	0.6	0.04	distributed	FALSE	170	173	180	219	313	211	0.171375	6.7	70
220	50	4	0.8	0.02	two-point	FALSE	130	164	200	294	269	211.4	0.23575	3.48	70
221	50	4	0.6	0.02	two-point	FALSE	135	157	194	267	307	212	0.2	3.57	70
222	150	2	0.8	0	distributed	FALSE	315	252	240	82	191	216	0.075	10.27	70
223	50	2	1	0.02	two-point	TRUE	194	219	152	289	227	216.2	0.16075	3.83	70
224	200	2	1	0.02	two-point	FALSE	251	267	258	126	187	217.8	0.078625	12.2	70
225	100	2	1	0	distributed	TRUE	274	266	236	108	210	218.8	0.078625	6.98	70
226	100	2	0.6	0.02	distributed	TRUE	269	283	210	239	99	220	0.078625	7.18	70
227	150	2	1	0	distributed	FALSE	297	295	266	109	137	220.8	0.057125	9.97	70
228	50	4	0.8	0.02	distributed	FALSE	182	138	175	270	342	221.4	0.2	3.55	70
229	50	8	1	0.04	distributed	FALSE	163	155	174	286	331	221.8	0.217875	3.4	70
230	150	2	0.6	0	distributed	TRUE	237	223	208	211	231	222	0.071375	10.23	70
231	50	4	1	0.02	two-point	FALSE	146	139	183	299	345	222.4	0.217875	3.47	70
232	200	2	1	0.04	two-point	FALSE	261	296	251	202	102	222.4	0.042875	12.59	70
233	100	2	0.8	0.04	two-point	TRUE	218	263	201	284	151	223.4	0.053625	7.2	70
234	200	2	0.8	0.02	two-point	FALSE	213	274	248	180	214	225.8	0.053625	12.32	70
235	150	4	0.8	0.04	distributed	FALSE	248	216	205	217	247	226.6	0.08575	9.46	70
236	200	8	1	0	distributed	FALSE	203	204	227	197	305	227.2	0.067875	8.82	70
237	150	2	0.8	0.02	distributed	TRUE	266	318	237	224	97	228.4	0.03575	9.81	70
238	200	2	1	0.02	distributed	TRUE	295	329	294	164	66	229.6	0.053625	11.93	70
239	200	2	0.8	0.04	two-point	FALSE	255	311	260	210	120	231.2	0.032125	12.17	70
240	200	4	1	0	two-point	TRUE	201	201	229	248	277	231.2	0.042875	9.24	70
241	100	2	1	0.04	two-point	TRUE	245	245	249	263	158	232	0.06075	6.81	70
242	200	2	0.8	0.04	distributed	TRUE	284	328	255	226	67	232	0.05	12.63	70
243	200	2	0.6	0.04	two-point	FALSE	270	298	274	249	72	232.6	0.025	11.91	70
244	50	4	0.6	0.02	distributed	FALSE	159	192	212	274	332	233.8	0.175	3.59	70
245	50	4	0.8	0.04	two-point	FALSE	181	162	181	300	346	234	0.132125	3.31	70
246	200	2	0.8	0	two-point	FALSE	225	198	241	225	284	234.6	0.053625	11.71	70
247	150	2	0.8	0.04	distributed	TRUE	278	316	273	231	92	238	0.028625	9.51	70
248	150	2	0.6	0.02	two-point	FALSE	228	227	257	238	243	238.6	0.032125	9.4	70
249	100	2	0.8	0.02	distributed	TRUE	246	300	261	228	159	238.8	0.042875	7	70
250	50	4	1	0.02	distributed	FALSE	192	166	222	282	333	239	0.178625	3.58	70
251	150	2	0.8	0.02	two-point	FALSE	231	272	259	220	213	239	0.03575	9.25	70
252	50	4	1	0.04	two-point	FALSE	160	196	199	287	358	240	0.157125	3.32	70
253	100	2	0.6	0.04	distributed	TRUE	244	275	277	280	126	240.4	0.028625	6.82	70
254	50	2	0.6	0.04	two-point	TRUE	249	235	256	319	149	241.6	0.06075	3.69	70
255	50	4	0.6	0.04	two-point	FALSE	173	160	218	314	343	241.6	0.142875	3.3	70
256	100	2	0.6	0.02	two-point	FALSE	238	218	247	257	248	241.6	0.046375	6.65	70
257	100	4	0.8	0.04	distributed	FALSE	216	236	244	218	294	241.6	0.075	6.48	70
258	150	2	0.8	0	two-point	TRUE	222	213	270	251	275	246.2	0.032125	8.72	70
259	50	2	0.8	0.04	two-point	TRUE	207	282	265	321	161	247.2	0.057125	3.63	70
260	100	2	0.6	0	distributed	TRUE	288	230	253	232	233	247.2	0.053625	6.47	70
261	100	4	1	0	distributed	FALSE	275	212	243	234	273	247.4	0.025	5.32	70
262	200	2	1	0.02	distributed	FALSE	296	325	293	241	84	247.8	0.017875	11.93	70
263	150	4	1	0.04	distributed	FALSE	324	264	252	181	223	248.8	0.053625	9.12	70
264	200	2	0.6	0.02	distributed	FALSE	310	309	284	222	121	249.2	0.021375	12.13	70
265	200	2	0.6	0	two-point	TRUE	232	222	250	295	253	250.4	0.03575	11.22	70
266	150	2	1	0.02	two-point	FALSE	263	284	297	206	205	251	0.042875	9.4	70
267	150	2	1	0	two-point	FALSE	223	239	268	246	283	251.8	0.03925	8.6	70
268	200	2	0.6	0.04	distributed	FALSE	280	327	290	254	108	251.8	0.017875	12.37	70
269	200	4	1	0	two-point	FALSE	204	197	264	276	320	252.2	0.053625	8.77	70
270	200	2	0.8	0.02	distributed	FALSE	314	335	291	212	111	252.6	0.028625	11.83	70
271	100	2	1	0	two-point	TRUE	230	229	263	260	288	254	0.03925	5.87	70
272	50	2	0.6	0.02	distributed	TRUE	241	260	217	308	252	255.6	0.092875	3.73	70
273	150	2	0.6	0	distributed	FALSE	276	270	281	198	257	256.4	0.042875	9.68	70
274	200	2	1	0.04	distributed	TRUE	290	342	269	281	100	256.4	0.01075	11.82	70
275	100	2	1	0	distributed	FALSE	329	297	283	140	237	257.2	0.042875	6.66	70
276	150	2	0.6	0.02	distributed	FALSE	321	317	298	200	157	258.6	0.03575	9.15	70
277	150	2	0.6	0.04	two-point	FALSE	262	301	288	261	181	258.6	0.028625	9.1	70
278	100	2	0.8	0.02	two-point	FALSE	279	246	296	242	239	260.4	0.028625	6.09	70
279	200	2	1	0.04	distributed	FALSE	285	344	309	255	110	260.6	0.021375	11.63	70
280	150	2	1	0.02	distributed	TRUE	306	326	280	204	190	261.2	0.028625	9.18	70
281	50	4	0.6	0.04	distributed	FALSE	202	208	231	326	340	261.4	0.071375	3.3	70
282	100	4	1	0.04	distributed	FALSE	305	244	272	233	258	262.4	0.071375	6.32	70
283	200	2	0.8	0.04	distributed	FALSE	294	338	292	264	138	265.2	0.021375	11.66	70
284	150	4	0.8	0	distributed	TRUE	257	258	216	328	268	265.4	0.03575	7.15	70
285	200	4	0.8	0	distributed	FALSE	236	254	223	298	317	265.6	0.03925	9.57	70
286	50	2	0.8	0.02	distributed	TRUE	256	288	271	310	207	266.4	0.067875	3.69	70
287	200	4	0.8	0	two-point	TRUE	253	243	289	297	251	266.6	0.017875	8.45	70
288	150	2	1	0.02	distributed	FALSE	319	350	324	247	98	267.6	0.021375	9	70
289	150	2	1	0.04	two-point	FALSE	281	315	299	266	185	269.2	0.01425	9.08	70
290	150	8	1	0	distributed	TRUE	220	248	267	309	304	269.6	0.06425	6.33	70
291	150	2	0.6	0.04	distributed	FALSE	300	346	307	278	118	269.8	0.017875	9.1	70
292	150	2	0.8	0	two-point	FALSE	259	220	306	252	321	271.6	0.042875	8.26	70
293	50	2	0.6	0.04	distributed	TRUE	258	304	279	305	218	272.8	0.032125	3.62	70
294	150	2	0.8	0.04	two-point	FALSE	271	314	302	273	209	273.8	0.017875	8.81	70
295	150	4	1	0	two-point	TRUE	252	221	282	320	300	275	0.025	6.57	70
296	150	2	1	0.04	distributed	TRUE	304	332	301	291	152	276	0.01075	9.03	70
297	100	2	0.8	0	distributed	FALSE	323	303	254	259	244	276.6	0.028625	6.56	70
298	100	2	1	0.02	distributed	TRUE	312	367	300	240	165	276.8	0.017875	6.25	70
299	50	2	1	0.04	two-point	TRUE	307	290	262	322	226	281.4	0.025	3.42	70
300	150	2	1	0.04	distributed	FALSE	311	363	328	262	147	282.2	0.021375	8.88	70
301	50	4	0.8	0.04	distributed	FALSE	247	256	278	313	318	282.4	0.053625	3.23	70
302	100	2	1	0.02	two-point	FALSE	282	285	276	292	279	282.8	0.025	6.25	70
303	200	2	0.6	0	two-point	FALSE	260	233	303	303	334	286.6	0.021375	10.53	70
304	100	2	0.8	0.04	distributed	TRUE	308	336	287	317	197	289	0.025	6.31	70
305	150	2	0.8	0.02	distributed	FALSE	325	360	313	272	177	289.4	0.01075	8.97	70
306	150	2	0.8	0.04	distributed	FALSE	313	349	330	265	194	290.2	0.021375	8.47	70
307	200	4	0.8	0	two-point	FALSE	268	241	308	337	299	290.6	0.01075	8.24	70
308	150	2	0.6	0	two-point	TRUE	265	269	310	324	298	293.2	0.03575	8.16	70
309	100	2	0.8	0.04	two-point	FALSE	301	322	318	307	219	293.4	0.007125	6.09	70
310	100	2	1	0	two-point	FALSE	272	271	317	285	341	297.2	0.025	5.48	70
311	50	2	1	0	distributed	TRUE	298	287	315	306	281	297.4	0.021375	3.14	70
312	100	2	0.8	0.02	distributed	FALSE	316	370	322	253	228	297.8	0.017875	6.07	70
313	100	2	0.6	0.04	two-point	FALSE	318	323	321	316	217	299	0.007125	6.06	70
314	50	2	1	0.02	distributed	TRUE	335	339	286	277	261	299.6	0.03925	3.46	70
315	150	8	1	0	distributed	FALSE	299	262	285	318	335	299.8	0.03575	6.17	70
316	100	2	0.6	0.02	distributed	FALSE	328	345	316	283	229	300.2	0.007125	6.03	70
317	150	4	1	0	two-point	FALSE	264	255	311	338	336	300.8	0.017875	6.27	70
318	50	4	1	0.04	distributed	FALSE	336	278	275	290	326	301	0.046375	3.23	70
319	200	8	1	0	two-point	FALSE	240	251	314	350	351	301.2	0.01425	7.41	70
320	100	2	0.6	0.04	distributed	FALSE	334	376	333	275	198	303.2	0.017875	6	70
321	100	2	1	0.04	distributed	TRUE	303	375	327	312	204	304.2	0.003625	6.19	70
322	200	8	1	0	two-point	TRUE	267	261	305	341	347	304.2	0.028625	7.51	70
323	150	4	0.8	0	distributed	FALSE	292	292	295	335	309	304.6	0.032125	6.89	70
324	100	2	0.8	0	two-point	TRUE	273	277	326	315	338	305.8	0.021375	5.44	70
325	100	2	1	0.04	two-point	FALSE	309	354	323	301	263	310	0.01425	5.9	70
326	100	2	1	0.02	distributed	FALSE	343	369	320	288	236	311.2	0.01075	6	70
327	100	2	0.6	0	distributed	FALSE	320	294	304	330	310	311.6	0.021375	6.1	70
328	50	2	1	0.02	two-point	FALSE	341	307	312	311	308	315.8	0.025	3.14	70
329	50	2	0.8	0	distributed	TRUE	330	291	334	304	324	316.6	0.028625	3.11	70
330	50	2	0.6	0.02	two-point	FALSE	326	302	319	331	316	318.8	0.021375	3.09	70
331	50	2	0.8	0.04	distributed	TRUE	283	337	332	332	311	319	0.01425	3.34	70
332	100	2	0.8	0.04	distributed	FALSE	333	366	347	327	225	319.6	0	5.93	70
333	150	2	0.6	0	two-point	FALSE	293	276	329	349	352	319.8	0.003625	7.65	70
334	100	2	1	0.04	distributed	FALSE	344	383	346	296	259	325.6	0.01425	5.71	70
335	50	2	0.8	0.02	two-point	FALSE	342	312	325	329	330	327.6	0.003625	3.18	70
336	100	4	1	0	two-point	TRUE	322	293	342	356	325	327.6	0.007125	4.16	70
337	50	2	1	0.04	distributed	TRUE	338	364	339	293	312	329.2	0.017875	3.16	70
338	150	4	0.8	0	two-point	TRUE	317	273	345	364	357	331.2	0.01075	6.06	70
339	150	4	0.8	0	two-point	FALSE	331	289	350	347	339	331.2	0.007125	5.99	70
340	100	2	0.8	0	two-point	FALSE	354	286	336	342	353	334.2	0.003625	5.14	70
341	100	4	0.8	0	distributed	TRUE	327	324	331	348	364	338.8	0.017875	4.45	70
342	200	4	0.6	0	distributed	TRUE	352	308	335	351	350	339.2	0.021375	8.06	70
343	200	4	0.6	0	two-point	TRUE	356	280	340	365	366	341.4	0.007125	7.78	70
344	100	4	1	0	two-point	FALSE	340	313	355	363	344	343	0.003625	4.03	70
345	200	8	0.8	0	two-point	TRUE	345	299	370	372	329	343	0.007125	7.21	70
346	50	2	1	0.04	two-point	FALSE	353	387	351	334	291	343.2	0.007125	3.01	70
347	100	4	0.8	0	distributed	FALSE	350	305	341	353	368	343.4	0.025	4.3	70
348	150	8	1	0	two-point	TRUE	346	279	368	366	359	343.6	0.003625	5.46	70
349	150	8	1	0	two-point	FALSE	337	310	343	357	373	344	0.003625	5.5	70
350	200	8	0.8	0	two-point	FALSE	347	330	338	370	337	344.4	0.007125	7.29	70
351	200	4	0.6	0	two-point	FALSE	332	320	352	362	360	345.2	0.007125	7.81	70
352	50	4	1	0	distributed	TRUE	339	331	360	352	349	346.2	0.003625	2.27	70
353	50	2	0.6	0.02	distributed	FALSE	358	359	353	336	327	346.6	0.01075	2.96	70
354	50	2	0.8	0.02	distributed	FALSE	372	386	354	333	302	349.4	0.007125	3.07	70
355	100	8	1	0	distributed	TRUE	349	319	344	368	367	349.4	0.007125	3.93	70
356	50	2	0.6	0.04	two-point	FALSE	355	379	356	343	315	349.6	0.003625	3.04	70
357	50	2	1	0.02	distributed	FALSE	357	381	362	325	323	349.6	0.007125	3.03	70
358	50	2	0.8	0.04	distributed	FALSE	362	385	358	344	301	350	0.007125	3.08	70
359	50	2	0.8	0.04	two-point	FALSE	348	372	364	339	328	350.2	0.01425	3.08	70
360	50	2	1	0	two-point	TRUE	364	306	373	354	370	353.4	0.003625	2.48	70
361	50	2	1	0	distributed	FALSE	381	358	357	323	348	353.4	0.007125	2.86	70
362	50	2	0.6	0.04	distributed	FALSE	369	392	361	340	306	353.6	0.007125	3.03	70
363	100	8	1	0	distributed	FALSE	359	343	337	371	365	355	0.01425	3.82	70
364	200	8	0.8	0	distributed	TRUE	363	340	348	373	354	355.6	0.01425	7.26	70
365	100	2	0.6	0	two-point	TRUE	368	334	365	360	355	356.4	0.003625	4.94	70
366	200	4	0.6	0	distributed	FALSE	360	333	372	355	362	356.4	0.01425	7.8	70
367	200	8	0.8	0	distributed	FALSE	351	362	349	359	363	356.8	0.01425	7.29	70
368	50	2	1	0.04	distributed	FALSE	371	390	371	345	322	359.8	0	2.96	70
369	50	2	0.8	0	distributed	FALSE	374	361	367	346	361	361.8	0.007125	2.82	70
370	150	4	0.6	0	two-point	FALSE	370	321	378	375	374	363.6	0	5.7	70
371	150	4	0.6	0	two-point	TRUE	361	352	375	378	356	364.4	0.007125	5.73	70
372	100	2	0.6	0	two-point	FALSE	366	351	377	367	369	366	0.01425	4.7	70
373	50	4	1	0	distributed	FALSE	377	357	369	358	378	367.8	0.007125	2.17	70
374	150	8	0.8	0	distributed	TRUE	379	353	363	377	383	371	0.003625	5.42	70
375	100	4	0.8	0	two-point	TRUE	378	341	381	379	377	371.2	0.003625	3.94	70
376	150	4	0.6	0	distributed	TRUE	373	377	359	382	375	373.2	0.01075	5.92	70
377	50	2	0.6	0	distributed	TRUE	367	371	380	369	384	374.2	0.01075	2.71	70
378	150	8	0.8	0	two-point	TRUE	375	348	383	385	380	374.2	0	5.29	70
379	50	2	1	0	two-point	FALSE	385	356	393	361	382	375.4	0	2.36	70
380	200	8	0.6	0	two-point	TRUE	365	368	384	389	372	375.6	0	7	70
381	150	8	0.8	0	distributed	FALSE	387	380	374	374	371	377.2	0.01075	5.37	70
382	100	8	1	0	two-point	FALSE	384	355	382	381	385	377.4	0	3.58	70
383	150	4	0.6	0	distributed	FALSE	376	374	379	380	381	378	0.01075	5.8	70
384	50	2	0.8	0	two-point	TRUE	390	347	386	383	388	378.8	0	2.48	70
385	100	4	0.8	0	two-point	FALSE	383	378	388	376	391	383.2	0.007125	3.79	70
386	150	8	0.8	0	two-point	FALSE	380	373	385	387	392	383.4	0.003625	5.25	70
387	200	8	0.6	0	two-point	FALSE	388	365	387	388	390	383.6	0.003625	6.95	70
388	50	2	0.6	0	distributed	FALSE	382	391	376	386	386	384.2	0.01075	2.52	70
389	100	8	1	0	two-point	TRUE	391	382	389	384	379	385	0	3.54	70
390	200	8	0.6	0	distributed	FALSE	386	389	366	395	393	385.8	0.007125	6.95	70
391	200	8	0.6	0	distributed	TRUE	389	388	395	391	376	387.8	0	6.91	70
392	100	4	0.6	0	distributed	TRUE	396	395	394	393	387	393	0	3.77	70
393	100	8	0.8	0	distributed	TRUE	393	394	390	396	397	394	0.003625	3.55	70
394	100	4	0.6	0	two-point	TRUE	401	384	402	397	396	396	0	3.71	70
395	50	4	0.8	0	distributed	TRUE	406	400	396	394	389	397	0.003625	1.98	70
396	150	8	0.6	0	two-point	FALSE	392	399	392	399	403	397	0	5.11	70
397	150	8	0.6	0	two-point	TRUE	397	398	399	398	394	397.2	0.003625	5.13	70
398	50	2	0.8	0	two-point	FALSE	399	393	401	390	405	397.6	0	2.25	70
399	100	4	0.6	0	two-point	FALSE	404	396	405	392	401	399.6	0	3.71	70
400	100	8	0.8	0	distributed	FALSE	400	407	391	407	400	401	0.003625	3.49	70
401	100	4	0.6	0	distributed	FALSE	405	403	397	403	399	401.4	0	3.74	70
402	50	4	0.8	0	distributed	FALSE	409	409	400	400	395	402.6	0.003625	1.9	70
403	50	4	1	0	two-point	FALSE	398	401	407	401	408	403	0	1.84	70
404	100	8	0.8	0	two-point	FALSE	395	404	411	402	404	403.2	0	3.44	70
405	150	8	0.6	0	distributed	TRUE	411	406	398	406	398	403.8	0.003625	5.13	70
406	100	8	0.8	0	two-point	TRUE	403	397	409	405	407	404.2	0.003625	3.46	70
407	150	8	0.6	0	distributed	FALSE	402	410	403	410	402	405.4	0	5.08	70
408	50	2	0.6	0	two-point	TRUE	394	402	410	409	414	405.8	0	2.23	70
409	50	4	1	0	two-point	TRUE	408	405	406	404	406	405.8	0.003625	1.91	70
410	50	8	1	0	distributed	TRUE	410	408	404	413	411	409.2	0	1.78	70
411	50	2	0.6	0	two-point	FALSE	407	416	413	408	410	410.8	0	2.13	70
412	50	8	1	0	distributed	FALSE	415	411	408	411	409	410.8	0	1.75	70
413	100	8	0.6	0	two-point	TRUE	418	414	414	412	413	414.2	0	3.37	70
414	50	4	0.8	0	two-point	FALSE	413	412	415	416	420	415.2	0	1.79	70
415	100	8	0.6	0	distributed	TRUE	419	419	412	414	412	415.2	0	3.36	70
416	100	8	0.6	0	two-point	FALSE	412	413	419	420	417	416.2	0	3.38	70
417	100	8	0.6	0	distributed	FALSE	417	417	416	415	416	416.2	0.003625	3.32	70
418	50	4	0.8	0	two-point	TRUE	414	415	418	418	418	416.6	0	1.83	70
419	50	8	1	0	two-point	TRUE	421	421	424	417	415	419.6	0.003625	1.7	70
420	50	8	1	0	two-point	FALSE	416	422	422	421	421	420.4	0	1.69	70
421	50	4	0.6	0	distributed	TRUE	420	418	421	423	424	421.2	0	1.8	70
422	50	4	0.6	0	distributed	FALSE	424	428	420	419	422	422.6	0	1.77	70
423	50	8	0.8	0	distributed	TRUE	423	425	417	426	423	422.8	0	1.67	70
424	50	4	0.6	0	two-point	TRUE	422	420	425	422	429	423.6	0	1.75	70
425	50	8	0.8	0	distributed	FALSE	426	427	423	428	419	424.6	0	1.68	70
426	50	4	0.6	0	two-point	FALSE	425	423	426	424	426	424.8	0	1.73	70
427	50	8	0.8	0	two-point	TRUE	428	426	427	425	427	426.6	0	1.65	70
428	50	8	0.8	0	two-point	FALSE	427	424	430	427	425	426.6	0	1.65	70
429	50	8	0.6	0	two-point	TRUE	431	429	431	431	428	430	0	1.63	70
430	50	8	0.6	0	distributed	TRUE	430	432	428	432	430	430.4	0	1.63	70
431	50	8	0.6	0	distributed	FALSE	432	430	429	429	432	430.4	0	1.63	70
432	50	8	0.6	0	two-point	FALSE	429	431	432	430	431	430.6	0	1.62	70
* Test Cases 1-4
